# Supplementary material
Source: PubMed Central journal article supplement (PMC141207)

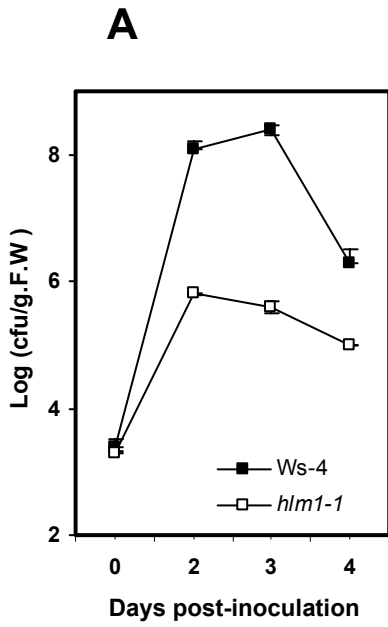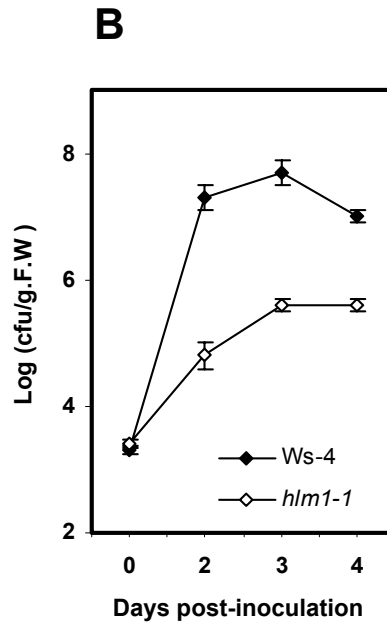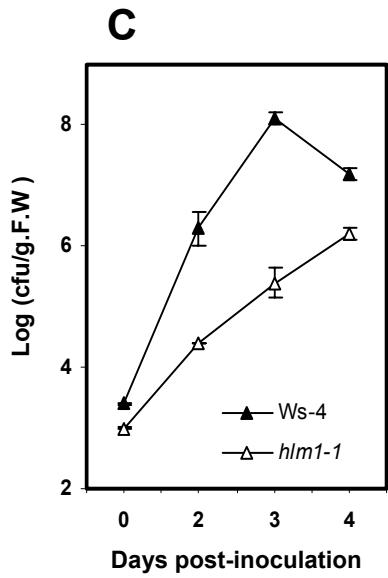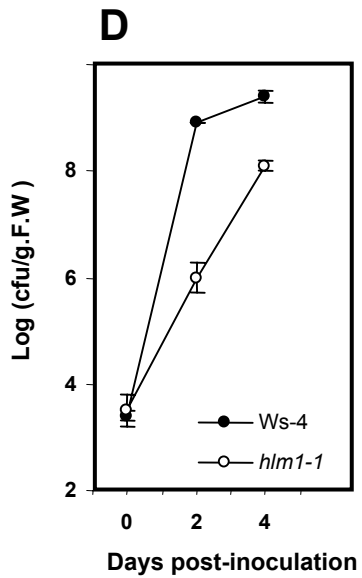

**Figure 9**  
Balagué *et al*

Supplement: plntcell_15_2_365__1.pdf [file plntcell_15_2_365__1.pdf]
